# Supplementary material for: Testing the limits of short-reads metagenomic classifications programs in waste water treating microbial communities
Source: Research Square preprint supplement (doi:10.21203/rs.3.rs-6485360/v1), 2025-05-08
Supplement: Supplementary file 1 [file 3bb7e404d0d1e22b0205996a.xlsx]

## Sheet: Metadata_workflows
Classifier	Database	Analysis on…	Settings
	SILVA138	reads	c0.05
	Kraken nt core	reads	c0.05
	SILVA138	reads	c0.15
	Kraken nt core	reads	c0.15
	SILVA138	reads	c0.3
	Kraken nt core	reads	c0.3
	SILVA138	reads	c0.45
Kraken	Kraken nt core	reads	c0.45
	SILVA138	reads	c0.65
	Kraken nt core	reads	c0.65
	SILVA138	reads	c0.85
	Kraken nt core	reads	c0.85
	SILVA138	reads	c0.99
	Kraken nt core	reads	c0.99
	Kraken nt core	contigs	c0.15
	SILVA138	reads (full 16S)	c0.8
RiboF	SILVA138	reads (full 16S)	c0.99
	SILVA138	reads (16S V3V4)	c0.8
	SILVA138	reads (16S V3V4)	c0.99
	Kaiju nr euk	reads	E0.0001_m11
	Kaiju nr euk	reads	E0.0001_m30
	Kaiju nr euk	reads	E0.01_m11
	Kaiju nr euk	reads	E0.01_m30
	Kaiju nr euk	reads	E0.0001_m42
	Kaiju nr euk	reads	E0.01_m42
Kaiju	Kaiju nr euk+	reads	E0.0001_m11
	Kaiju nr euk+	reads	E0.0001_m30
	Kaiju nr euk+	reads	E0.01_m11
	Kaiju nr euk+	reads	E0.01_m30
	Kaiju nr euk+	reads	E0.0001_m42
	Kaiju nr euk+	reads	E0.01_m42
	Kaiju nr euk+	contigs	E0.0001_m42
	kMetaShot db	contigs	custom_c0.2
	kMetaShot db	contigs	custom_c0.4
	kMetaShot db	contigs	default_c0.2
	kMetaShot db	contigs	default_c0.4
	kMetaShot db	contigs	metalarge_c0.2
kMetaShot	kMetaShot db	contigs	metalarge_c0.4
	kMetaShot db	MAGs	custom_c0.2
	kMetaShot db	MAGs	custom_c0.4
	kMetaShot db	MAGs	default_c0.2
	kMetaShot db	MAGs	default_c0.4
	kMetaShot db	MAGs	metalarge_c0.2
	kMetaShot db	MAGs	metalarge_c0.4
