# Supplementary material for: Testing the limits of short-reads metagenomic classifications programs in waste water treating microbial communities
Source: Research Square preprint supplement (doi:10.21203/rs.3.rs-6485360/v1), 2025-05-08
Supplement: Supplementary file 2 [file e09ac4c78efadc1c6245beee.docx]

**Supplementary figure 1**: PCoA plot illustrating the similarity between classification profiles based on Bray-Curtis dissimilarity index. Colors indicate the program, database, and classification level (read level by default, with additional specifications for contigs or MAGs level classifications where applicable). Labels on each point denote the specific settings used for the corresponding classification. In detail: “E” denotes the E-value threshold, “m” indicates the coverage threshold, and “c” represents the confidence level of the classification, depending on the classifier available options. The prefix “contigs” specifies classifications based on contigs rather than individual reads in case of Kaiju and Kraken2. The prefixes “default”, “large” (metalarge) and “custom” refer to the different MEGAHIT assembly settings.

**Supplementary figure 2**: Bar plots illustrating the relative abundances of the most abundant misclassified genera across classifications obtained using Kaiju with various parameter settings. The displayed relative abundances account for the correct classification counts (not shown in this plot), thereby representing the total extent of misclassifications. The x-axis represents the classification types: “E” denotes the E-value threshold while “m” indicates the coverage threshold.

**Supplementary figure 3**: Bar plots depicting the relative abundances of the T4 phage, *Homo*, *Diploscapter* and *Paramecium* present in the mock community as estimated by various programs and parameter settings. The column “T” displays the true abundances of the clades in the mock. Genera inferred but not actually included in the mock are categorized as “misclassified”. The x-axis represents the classification types: “E” denotes the E-value threshold, “m” indicates the coverage threshold, and “c” represents the confidence level of the classification, depending on the classifier available options. The prefix “contigs” specifies classifications based on contigs rather than individual reads in case of Kaiju and Kraken2. The prefixes “default”, “metalarge” and “custom” refer to the different MEGAHIT assembly settings.

**Supplementary table 1**: Summary of classifiers, databases and settings compared.

**Supplementary table 2**: Relative abundances of the genera present in the mock community as estimated by various programs and parameter settings.

**Supplementary table 3:** Relative abundances of the most abundant species present in the mock community as estimated by various programs and parameter settings.
